# Supplementary material for: Hierarchically Porous Carbon Networks Derived from Chitosan for High-Performance Electrochemical Double-Layer Capacitors
Source: MDPI journal article supplement (doi:10.3390/nano13222961), 2023-11-16
Supplement: s1 [file s1]

# Supporting Information for

## **Hierarchically porous carbon networks derived from chitosan for high-performance electrochemical double-layer capacitor**

Kwang Hyun Park<sup>1,†</sup>, Segi Byun<sup>2,3,†</sup>, Boemjin Ko<sup>1</sup>, Woong-Gil Hong<sup>4</sup>, Jungmo Kim<sup>5</sup>, Dongju Lee<sup>6,\*</sup>, Wang Geun Shim<sup>4,\*</sup>, and Sung Ho Song<sup>1,\*</sup>,

<sup>1</sup>Division of Advanced Materials Engineering, Center for Advanced Materials and Parts of Powders, Kongju National University, Cheonan-si 31080, Republic of Korea

<sup>2</sup>Hydrogen Convergence Materials Laboratory, Korea Institute of Energy Research (KIER), 152 Gajeong-ro, Yuseong-gu, Daejeon, 34129, Republic of Korea

<sup>3</sup>Energy Engineering, University of Science and Technology (UST), Daejeon, 34113, Republic of Korea

<sup>4</sup>Department of Chemical Engineering, Sunchon National University, 255 Jungang-Ro, Suncheon-si 57922, Republic of Korea.

<sup>5</sup>Nano Hybrid Technology Research Center, Korea Electrotechnology Research Institute (KERI), Changwon, 51543, Republic of Korea

<sup>6</sup>Department of Urban, Energy, and Environmental Engineering, Chungbuk National University, Chungdae-ro 1, Seowon-Gu, Cheongju, Chungbuk 28644, Republic of Korea

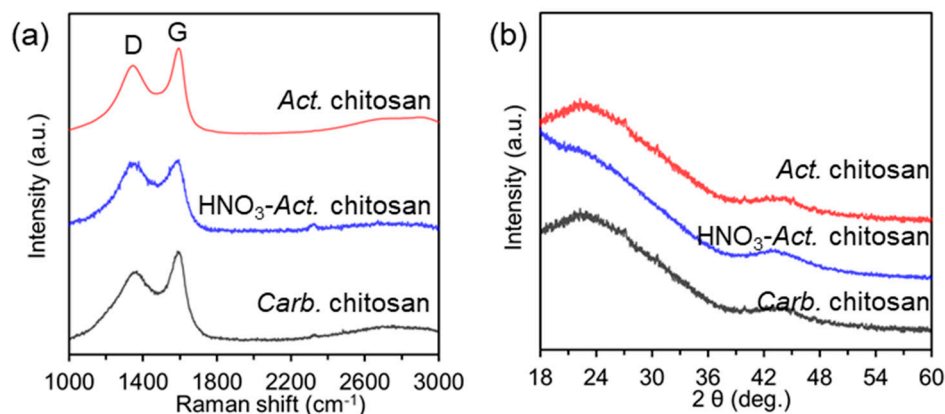

**Figure S1.** Raman spectroscopy and X-ray diffraction patterns of Carb. Chitosan, HNO<sub>3</sub>-Act. Chitosan. (a) Raman spectroscopy. (b) XRD patterns.

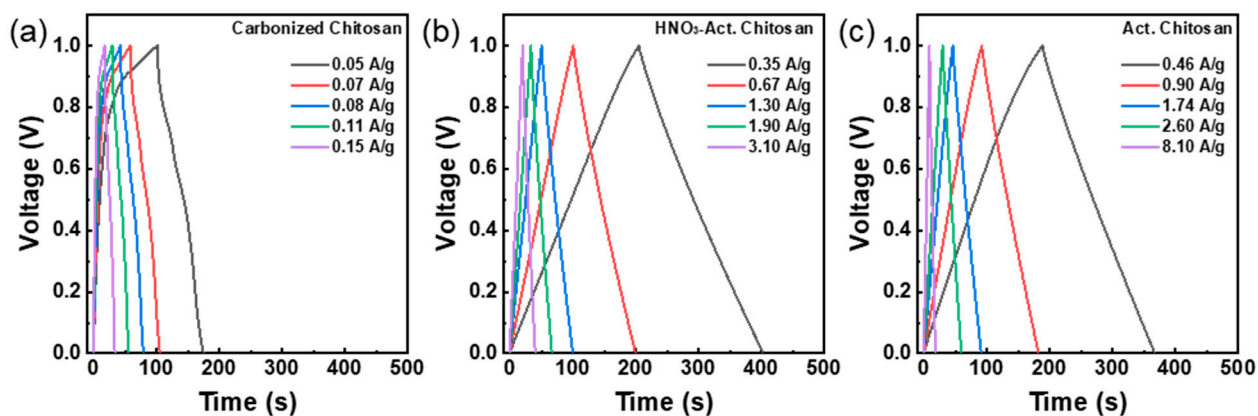

**Figure S2.** Galvanostatic charge/discharge (GCD) curves of (a) Carb. Chitosan, (b) HNO<sub>3</sub>-Act. Chitosan and (c) Act. Chitosan samples at a function of current densities.

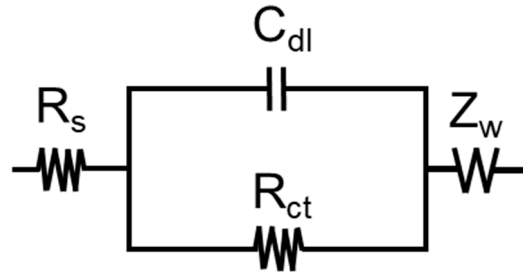

**Figure S3.** Equivalent circuit model for fitting of the Nyquist plot for various carbon samples.

$R_s$ : series resistance,  $R_{ct}$ : charge transfer resistance,  $C_{dl}$ : double layer capacitance, and  $Z_w$ : Warburg impedance.

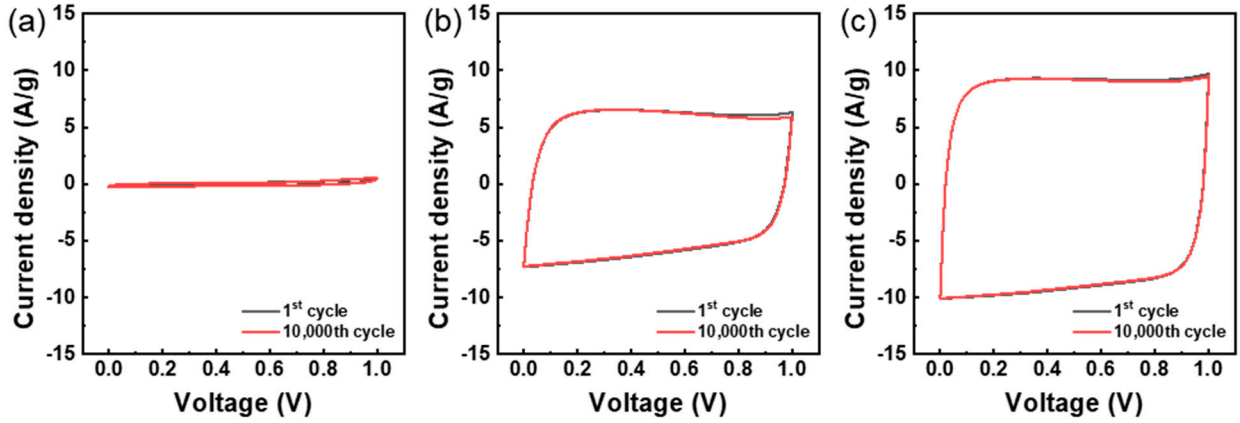

**Figure S4.** CV curves collected at the first and after 10,000 cycles. (a) *Carb. Chitosan*, (b) *HNO<sub>3</sub>-Act. Chitosan* and (c) *Act. Chitosan*

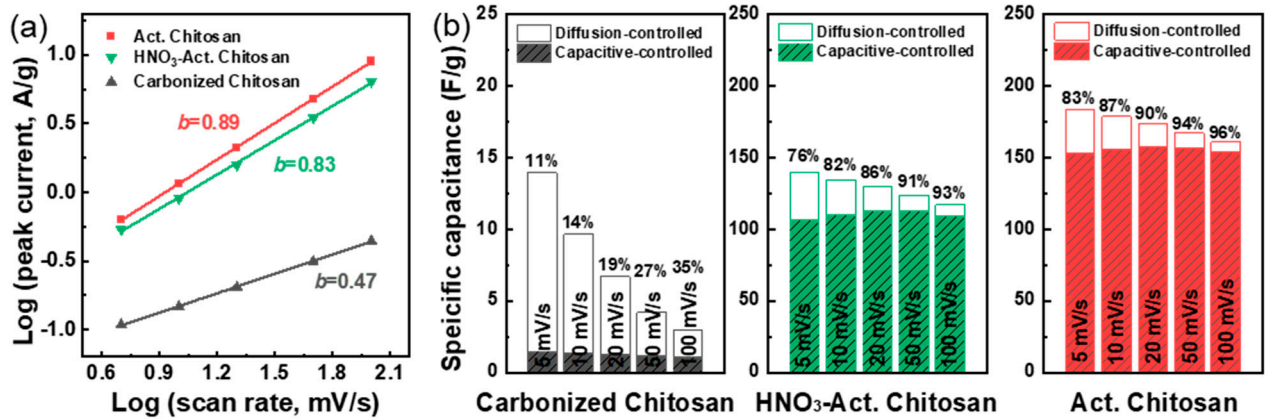

**Figure S5.** Charge storage mechanisms. (a)  $\log(I)$  vs.  $\log(v)$  plots of anodic current at 1.0 V. (b) Capacitance comparisons of *Carb.* Chitosan,  $\text{HNO}_3$ -*Act.* Chitosan, and *Act.* Chitosan samples with capacitive contribution at a scan rate from 5 to 100 mV/s.

**Table S1.** Detailed Nyquist plot fitting results for various carbon samples.

| Sample                                | $R_s$ ( $\Omega$ ) | $R_{ct}$ ( $\Omega$ ) |
|---------------------------------------|--------------------|-----------------------|
| <i>Carb.</i> Chitosan                 | 2.694              | 458.2                 |
| $\text{HNO}_3$ - <i>Act.</i> Chitosan | 3.667              | 0.438                 |
| <i>Act.</i> Chitosan                  | 2.807              | 0.395                 |
